# Supplementary material
Source: publisher figshare collection journal article supplement (https://tandf.figshare.com/articles/dataset/_/27628244)
Supplement: Supplementary file 1 [file 1]

**
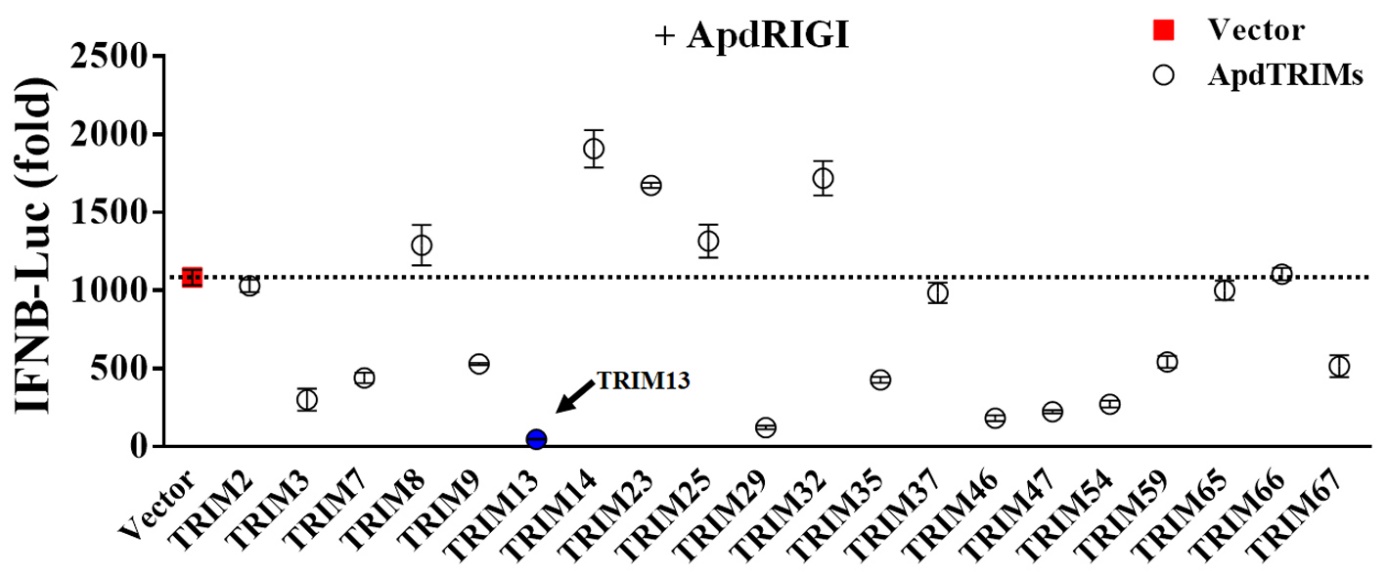
**

**Figure S1.** Screening on the roles of duck TRIM family proteins in innate immunity. DEFs were co-transfected with Flag-ApdRIGI and plasmids expressing duck TRIM proteins or empty vector, together with IFNB-Luc and pRL-TK. Luciferase assays were performed at 30 h after transfection.


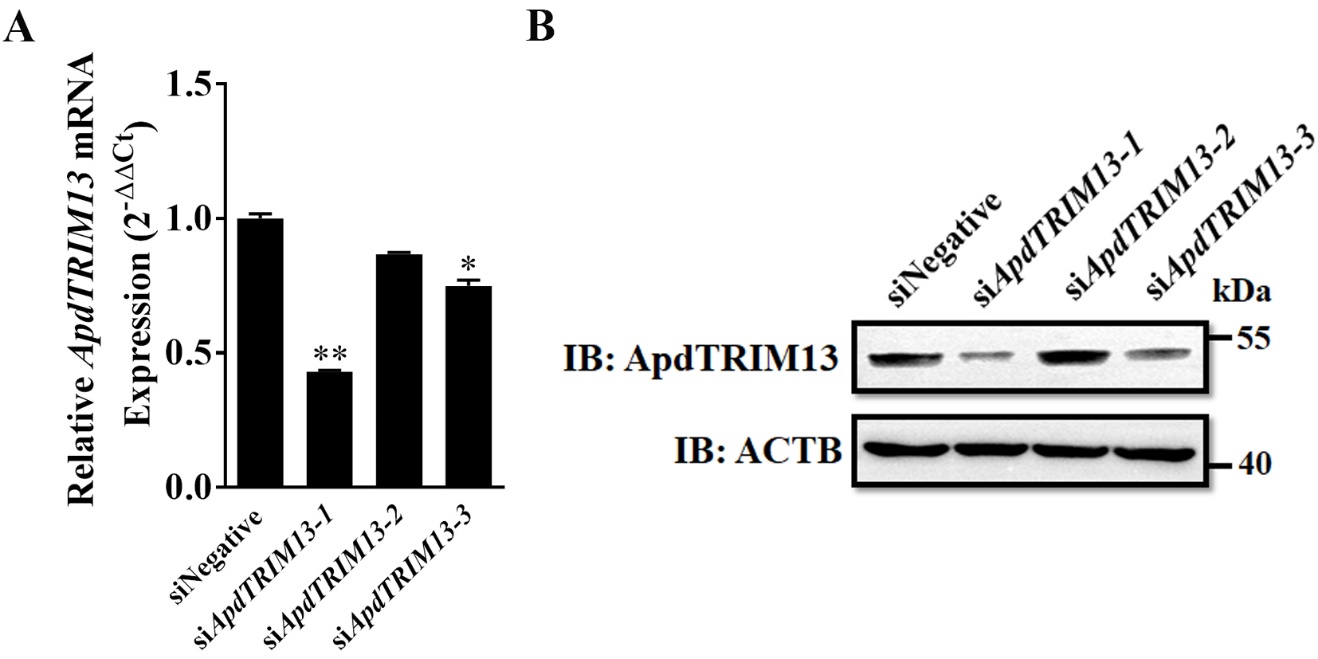


**Figure S2.** Gene silencing efficiency of siRNA targeting *ApdTRIM13* in DEFs. DEFs were transfected with control siRNA (siNegative) or siRNA targeting *ApdTRIM13* (si*ApdTRIM13*). (**A**) At 30 h post-transfection, intracellular mRNA was extracted to analyze the abundance of *ApdTRIM13* mRNA by RT-qPCR. Data are represented as mean ± SEM of three independent experiments. **P*< 0.05 and ***P* < 0.01 (unpaired Student's t-test). (**B**) Immunoblot analysis of extracts of DEFs transfected with siNegative or siRNA targeting *ApdTRIM13* with the indicated antibodies.

**
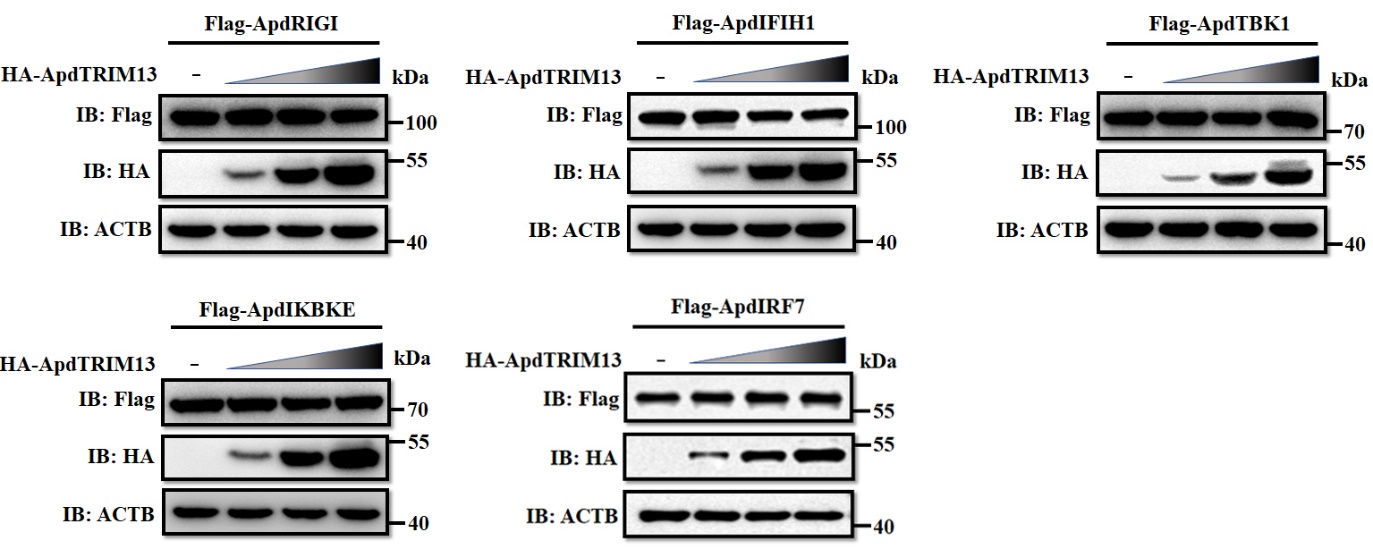
**

**Figure S3.** ApdTRIM13 cannot mediate the degradation of ApdRIGI, ApdIFIH1, ApdTBK1, ApdIKBKE or ApdIRF7. Immunoblot analysis of extracts from DEFs transfected with plasmids expressing Flag-tagged ApdRIGI, ApdIFIH1, ApdTBK1, ApdIKBKE or ApdIRF7 together with increasing amounts of plasmid expressing HA-ApdTRIM13 or empty vector.


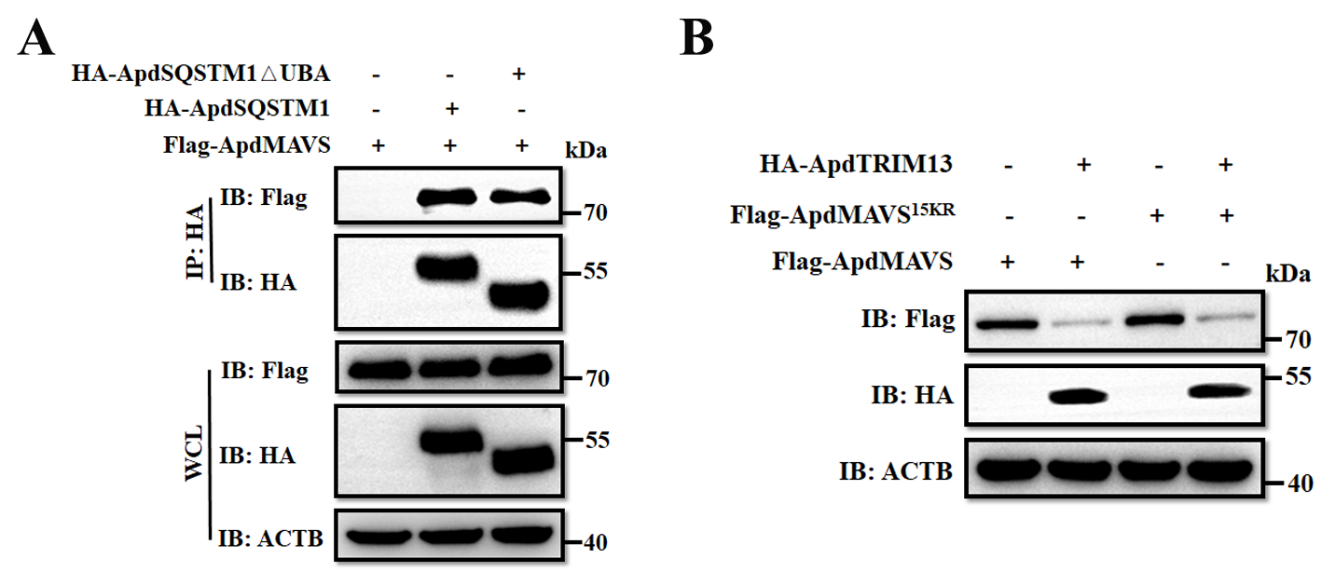


**Figure S4.** ApdTRIM13 destabilizes ApdMAVS independently of its ubiquitination. (**A**) HEK-293T cells were transfected with Flag-ApdMAVS together with HA-tagged ApdSQSTM1 or ApdSQSTM1 ΔUBA. Cell lysates were then immunoprecipitated with an anti-HA antibody and immunoblotted with anti-Flag and anti-HA antibodies. (**B**) DEFs were transfected with Flag-tagged ApdMAVS or ApdMAVS15KR, together with HA-ApdTRIM13 or an empty vector for 24 h. Cell lysates were used for immunoblot analysis with the indicated antibodies.


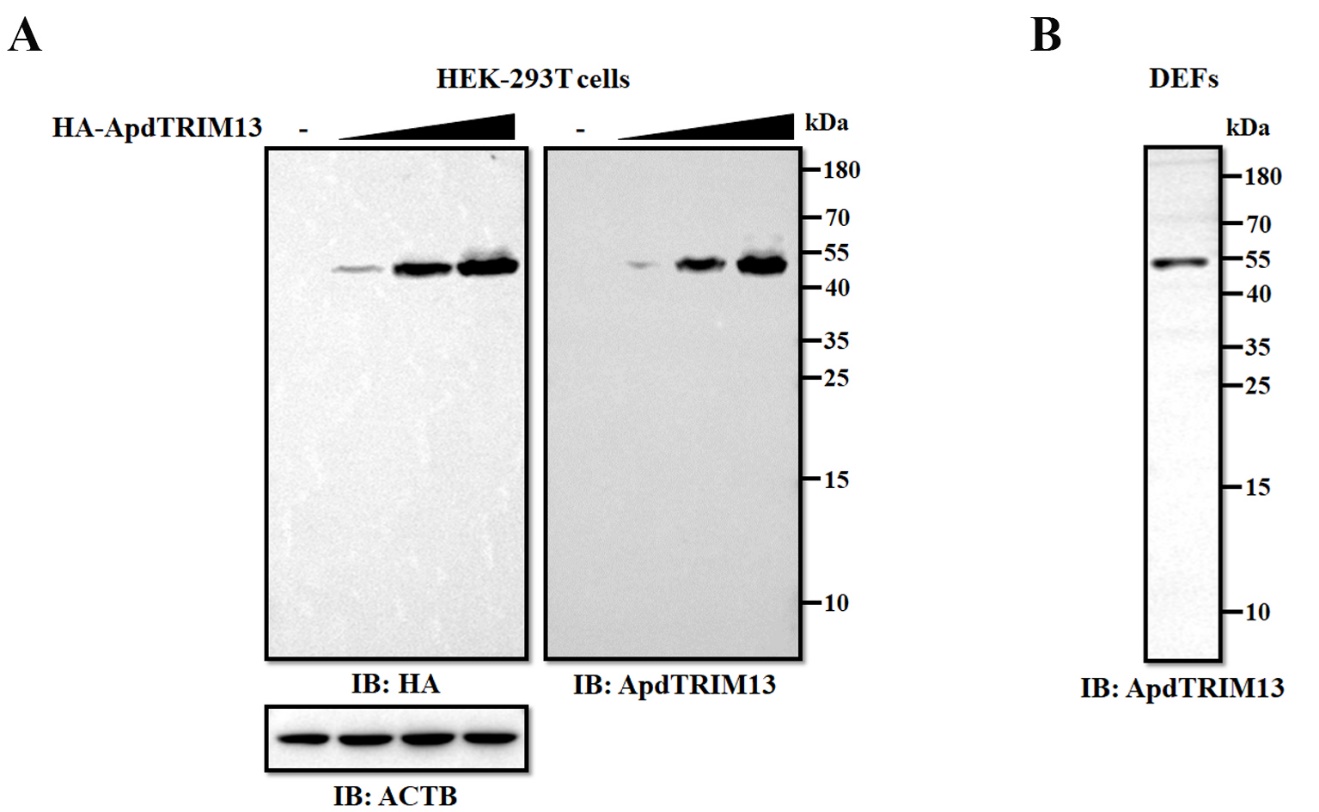


**Figure S5.** Validation of the specificity of the ApdTRIM13 antibody. (**A**) Immunoblot analysis of extracts from HEK-293T cells transfected with increasing amounts of HA-ApdTRIM13, using the indicated antibodies. (**B**) Immunoblot analysis of extracts from DEFs using an anti-ApdTRIM13 antibody.
